# Supplementary material for: AMPKα1 Regulates Lung and Breast Cancer Progression by Regulating TLR4-Mediated TRAF6-BECN1 Signaling Axis
Source: PubMed Central journal article supplement (PMC7694660; doi:10.3390/cancers12113289), 2020-11-06
Supplement: cancers-12-03289-s001.pdf [file cancers-12-03289-s001.pdf]

# Supplementary Materials: AMPK $\alpha$ 1 regulates lung and breast cancer progression by regulating TLR4-mediated TRAF6-BECN1 signaling axis

Mi-Jeong Kim, Yoon Min, Juhee Son, Ji Young Kim, Ji Su Lee, Duk-Hwan Kim and Ki-Young Lee

## 1. Supplementary materials and methods

### 1.1. Construction of truncated mutants

Truncated mutants of FLAG-TRAF6, FLAG-AMPK $\alpha$ 1, and MYC-BECN1 were generated, as previously described [1–6].

### 1.2. AMPK $\alpha$ 1-knockout cells

Guide RNA sequences for CRISPR/Cas9 were designed and AMPK $\alpha$ 1KO HEK293T, AMPK $\alpha$ 1KO MDA-MB-231, and AMPK $\alpha$ 1KO MCF-7 cells were generated, as previously described [2,4,7]. Insert oligonucleotides for human AMPK $\alpha$ 1 gRNA were 5'-CACCGGAAGATTCCGAGCCTTGATG-3'/3'-CCTTCTAAGCCTCGGAAGTACCAAAA-5'. The complementary oligonucleotides for guide RNAs (gRNAs) were annealed, and cloned into lenti CRISPR v2 vector (Addgene plasmid, Ca#52961). Lenti CRISPR v2/gRNA was transfected into HEK293T cells by using Lipofectamine 2000, according to the manufacturer's instructions. AMPK $\alpha$ 1KO colonies were isolated, as previously described [2,4,7], and confirmed by using western blot.

### 1.3. Western blotting analysis and endogenous immunoprecipitation assay

Cell lysates from control (Ctrl) HEK293T and AMPK $\alpha$ 1KO HEK293T cells, Ctrl MDA-MB-231 and AMPK $\alpha$ 1KO MDA-MB-231, or Ctrl MCF-7 and AMPK $\alpha$ 1KO MCF-7 cells were separated by 6–10% SDS-PAGE and probed with anti-AMPK $\alpha$ 1 or anti-GAPDH antibody. Ctrl MDA-MB-231 and AMPK $\alpha$ 1KO MDA-MB-231, or Ctrl MCF-7 and AMPK $\alpha$ 1KO MCF-7 cells were treated with or without 3-MA (5mM), or CQ (10  $\mu$ M), in the presence or absence of LPS (10  $\mu$ g/ml), for 6 h. Whole cell lysates were immunoblotted with anti-LC3 antibody and anti-GAPDH as a loading control. For endogenous immunoprecipitation assay, A549 cells (5  $\times$  10<sup>7</sup> cells per sample) were treated with or without LPS (10  $\mu$ g/ml) for 1 h. Cells were harvested and lysed on ice for 1 h with addition of 1.0 mL ice-cold RIPA buffer. The cellular debris were pelleted by centrifugation at 10,000 rpm for 10 min at 4  $^{\circ}$ C. The supernatant was then transferred to a fresh conical centrifuge tube on ice. Primary antibody (anti-TRAF6, 1:200) and IgG antibody as a control were added and incubated for 4 h at 4  $^{\circ}$ C. Then, protein A/G PLUS-Agarose was added and incubated at 4  $^{\circ}$ C on a rocker platform for 4 h. The immunoprecipitate was collected by centrifugation at 2500 rpm for 5 min at 4  $^{\circ}$ C. The pellet was then washed four times with 1.0 mL RIPA buffer. After the final wash, the pellet was resuspended in 100  $\mu$ L of 3% SDS. The samples were boiled for 5 min, and 20  $\mu$ L aliquots were separated by SDS-PAGE and probed with anti-TRAF6, anti-BECN1, or anti-AMPK $\alpha$ 1 antibody.

### 1.4. Reverse Transcription-Quantitative Polymerase Chain Reaction (RT-qPCR)

RT-qPCR analysis was performed, as previously described [4]. Briefly, Control (Ctrl) and AMPK $\alpha$ 1KO A549 cells were treated without, or with 10  $\mu$ g/mL LPS or LPS plus 3-MA (5 mM) for 6 h. Total RNA was extracted from cells using an RNA isolation kit (A&A Biotechnology, Gdynia, Poland) according to the manufacturer's protocol. cDNA was obtained by RT using a amfiRivert II cDNA Synthesis Master Mix (genDEPOT, R550), according to the manufacturer's protocol. Primers for hIL-6 (PPH 00560C), hMMP2 (PPH 00151B), and hCCL2 (PPH 00192F) were purchased from Qiagen, Inc. (Chatsworth, CA, USA). Fluorescence detection was performed using the ABI PRISM

44 7700 Sequence Detector (PerkinElmer; Applied Biosystems; Thermo Fisher Scientific, Inc.). The  
45 mRNA expressions were calculated and normalized to the level of GAPDH.

#### 46 1.5. Correlation analysis of AMPK $\alpha$ 1 (*PRKAA1*) in lung cancers

47 To analysis the correlation between AMPK $\alpha$ 1 (*PRKAA1*) and TRAF6, TAK1 (*MAP3K7*), or TLR4  
48 in lung cancers, we used GEPIA (Gene expression profiling interactive analysis, [http://gepia.cancer-  
pku.cn/](http://gepia.cancer-<br/>49 pku.cn/)).

## 50 2. Supplementary Tables

51 **Table 1.** Characteristics of the patients.

| Patient ID | Age | Sex   | Histology               | Stage <sup>a</sup> |
|------------|-----|-------|-------------------------|--------------------|
| LT01       | 76  | Man   | Squamous cell carcinoma | IIB                |
| LT02       | 77  | Man   | Squamous cell carcinoma | IIB                |
| LT03       | 75  | Man   | Large cell carcinoma    | IIA                |
| LT04       | 65  | Man   | Large cell carcinoma    | IIB                |
| LT05       | 67  | Man   | Squamous cell carcinoma | IIIA               |
| LT06       | 67  | Man   | Squamous cell carcinoma | IB                 |
| LT07       | 64  | Man   | Large cell carcinoma    | IIA                |
| LT08       | 59  | Man   | Squamous cell carcinoma | IIB                |
| LT09       | 65  | Woman | Adenocarcinoma          | IB                 |
| LT10       | 53  | Woman | Adenocarcinoma          | IIA                |
| LT11       | 54  | Woman | Adenocarcinoma          | IB                 |
| LT12       | 56  | Woman | Adenocarcinoma          | IB                 |
| LT13       | 70  | Man   | Adenocarcinoma          | IA                 |
| LT14       | 68  | Woman | Adenocarcinoma          | IB                 |
| LT15       | 72  | Woman | Large cell carcinoma    | IB                 |
| LT16       | 69  | Man   | Pleomorphic carcinoma   | IA                 |
| LT17       | 69  | Man   | Adenocarcinoma          | IA                 |
| LT18       | 60  | Woman | Adenocarcinoma          | IB                 |
| LT19       | 84  | Man   | Adenocarcinoma          | IB                 |
| LT20       | 70  | Man   | Adenocarcinoma          | IIB                |
| LT21       | 59  | Man   | Adenocarcinoma          | IB                 |
| LT22       | 38  | Woman | Adenocarcinoma          | IIA                |
| LT23       | 77  | Man   | Adenocarcinoma          | IA                 |
| LT24       | 79  | Woman | Adenocarcinoma          | IB                 |
| LT25       | 47  | Woman | Adenocarcinoma          | IB                 |
| LT26       | 81  | Man   | Adenocarcinoma          | IB                 |
| LT27       | 66  | Woman | Adenocarcinoma          | IIA                |
| LT28       | 75  | Man   | Adenocarcinoma          | IA                 |
| LT29       | 65  | Man   | Adenocarcinoma          | IA                 |
| LT30       | 50  | Woman | Adenocarcinoma          | IIA                |
| LT31       | 70  | Man   | Adenocarcinoma          | IB                 |
| LT32       | 72  | Man   | Large cell carcinoma    | IIA                |
| LT33       | 68  | Man   | Adenocarcinoma          | IB                 |
| LT34       | 59  | Woman | Adenocarcinoma          | IIA                |
| LT35       | 70  | Man   | Adenocarcinoma          | IB                 |
| LT36       | 63  | Man   | Squamous cell carcinoma | IB                 |
| LT37       | 68  | Man   | Adenocarcinoma          | IIB                |
| LT38       | 67  | Man   | Squamous cell carcinoma | IIB                |
| LT39       | 72  | Man   | Squamous cell carcinoma | IB                 |
| LT40       | 73  | Woman | Adenocarcinoma          | IB                 |
| LT41       | 43  | Woman | Adenocarcinoma          | IB                 |
| LT42       | 64  | Man   | Large cell carcinoma    | IB                 |

52 <sup>a</sup>The 7th edition of the TNM classification for lung cancer

53 3. Supplementary Figures

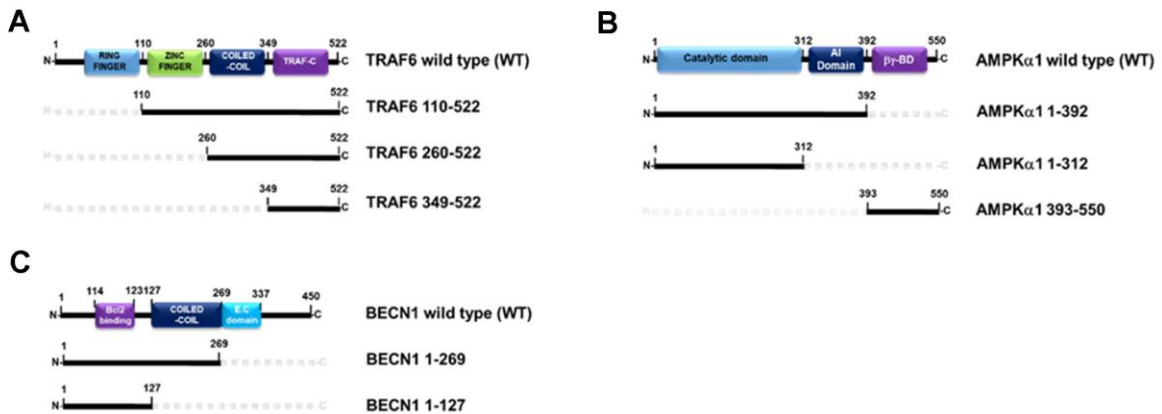

54

55 **Figure S1.** Truncated mutants of TRAF6, AMPK $\alpha$ 1, and BECN1. (A) Truncated mutants of TRAF6,  
 56 TRAF6 110-522, TRAF6 260-522, and TRAF6 349-522 were generated, as described in supplementary  
 57 Materials and Methods. (B) Truncated mutants of AMPK $\alpha$ 1, AMPK $\alpha$ 1 1-392, AMPK $\alpha$ 1 1-312, and  
 58 AMPK $\alpha$ 1 393-550 were generated, as described in supplementary Materials and Methods. (C)  
 59 Truncated mutants of BECN1, BECN1 1-269 and BECN1 1-127 were generated, as described in  
 60 supplementary Materials and Methods.

61

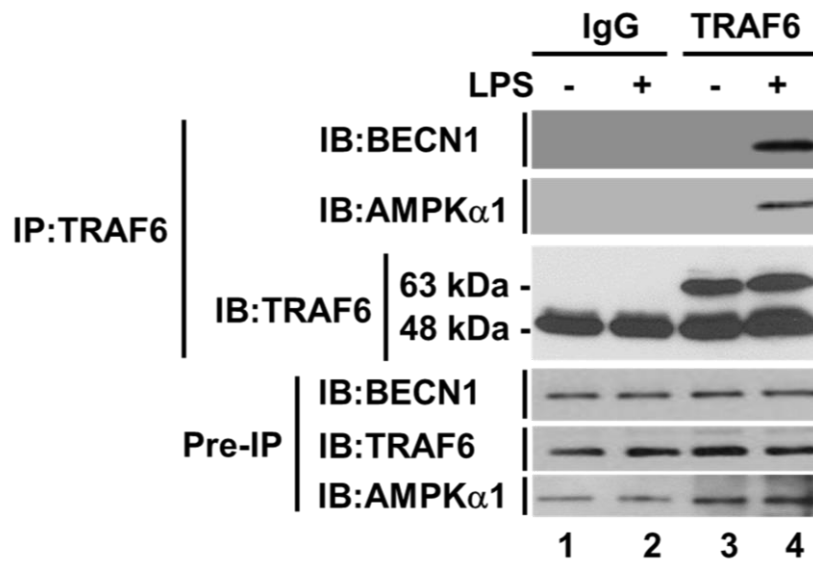

62

63 **Figure S2.** Endogenous immunoprecipitation assay with anti-TRAF6 antibody in A549 lung cancer  
 64 cells. A549 cells ( $5 \times 10^7$  cells per sample) were treated with or without LPS (10 mg/ml) for 1 h. Cells  
 65 were harvested and lysed on ice for 1 h with addition of 1.0 mL ice-cold RIPA buffer. The cellular  
 66 debris were pelleted by centrifugation at 10,000 rpm for 10 min at 4 °C. The supernatant was then  
 67 transferred to a fresh conical centrifuge tube on ice. Primary antibody (anti-TRAF6,1:200) and IgG  
 68 antibody as a control were added and incubated for 4 h at 4 °C. Then, protein A/G PLUS-Agarose was  
 69 added and incubated at 4 °C on a rocker platform for 4 h. The immunoprecipitate was collected by  
 70 centrifugation at 2500 rpm for 5 min at 4 °C. The pellet was then washed four times with 1.0 mL RIPA  
 71 buffer. After the final wash, the pellet was resuspended in 100  $\mu$ L of 3% SDS. The samples were boiled  
 72 for 5 min, and 20  $\mu$ L aliquots were separated by SDS-PAGE and probed with anti-TRAF6, anti-  
 73 BECN1, or anti-AMPK $\alpha$ 1 antibody. Uncropped western blot images available in Supplementary  
 74 Figure S12.

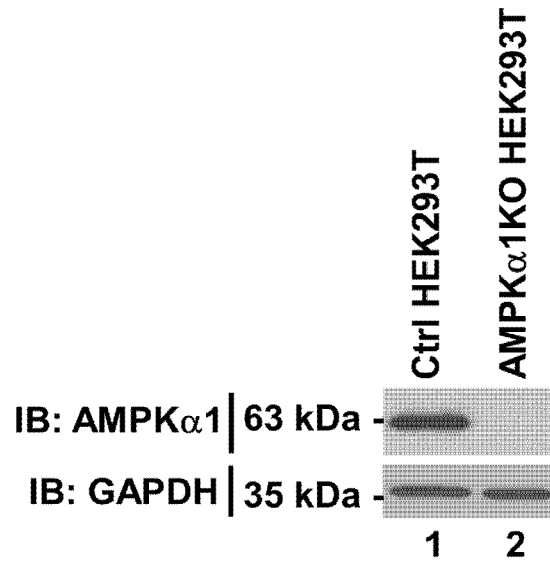

75

76 **Figure S3.** Generation of *AMPK $\alpha$ 1*-knockout HEK293T cells. *AMPK $\alpha$ 1*-knockout HEK293T cells were  
77 generated, as described in supplementary Materials and Methods. The efficacy of *AMPK $\alpha$ 1*-knockout  
78 was examined by using western blotting with antibodies to *AMPK $\alpha$ 1* or GAPDH as loading control.  
79 Uncropped western blot images available in Supplementary Figure S13.

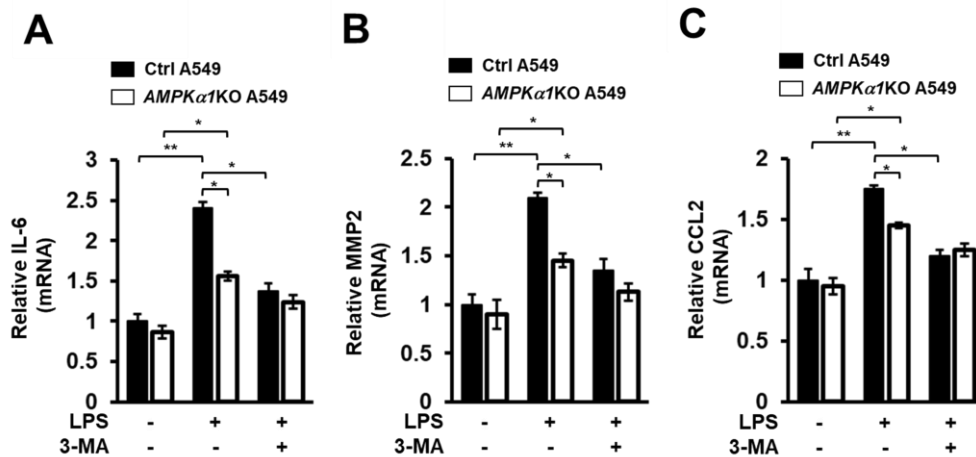

80

81 **Figure S4.** Measurement of IL-6 mRNA, MMP2 mRNA, and CCL2 mRNA in Ctrl A549 and  
82 *AMPK $\alpha$ 1*KO A549 cells in response to LPS stimulation. Control (Ctrl) and *AMPK $\alpha$ 1*KO A549 cells  
83 were treated without, or with 10  $\mu$ g/mL LPS or LPS plus 3-MA (5 mM), as indicated. Total RNA  
84 was extracted, cDNA was obtained, as described in supplementary Materials and Methods, and RT-  
85 qPCR analysis performed with specific primers, such as hIL-6 (A), hMMP2 (B), and hCCL2 (C). \* $p$  <  
86 0.05, \*\* $p$  < 0.01.

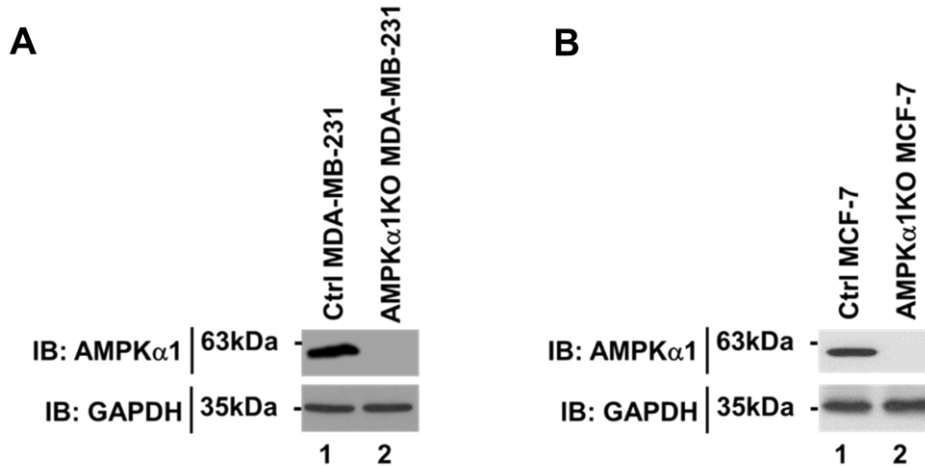

87

88

89

90

91

92

**Figure S5.** Generation of *AMPK $\alpha$ 1*-knockout MDA-MB-231 and *AMPK $\alpha$ 1*-knockout MCF-7 cells. (**A and B**) *AMPK $\alpha$ 1*-knockout MDA-MB-231 (**A**) and *AMPK $\alpha$ 1*-knockout MCF-7 cells (**B**) were generated, as described in supplementary Materials and Methods. The efficacy of *AMPK $\alpha$ 1*-knockout was examined by using western blotting with antibodies to AMPK $\alpha$ 1 or GAPDH as loading control. Uncropped western blot images available in Supplementary Figure S14.

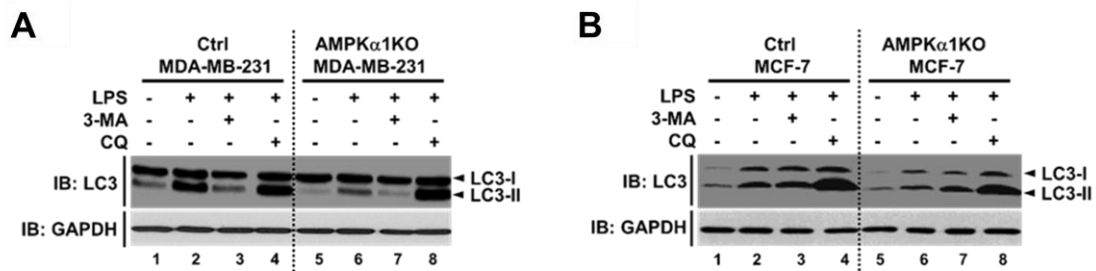

93

94

95

96

97

98

99

**Figure S6.** Suppression of autophagy in *AMPK $\alpha$ 1*-knockout MDA-MB-231 and *AMPK $\alpha$ 1*-knockout MCF-7 cells. (**A and B**) Ctrl MDA-MB-231 and *AMPK $\alpha$ 1*-knockout MDA-MB-231 (**A**), or Ctrl MCF-7 and *AMPK $\alpha$ 1*-knockout MCF-7 cells (**B**) were treated with or without 3-MA (5mM), or CQ (10  $\mu$ M), in the presence or absence of LPS (10  $\mu$ g/ml), for 6 h. Whole cell lysates were immunoblotted with anti-LC3 antibody and anti-GAPDH as a loading control. Uncropped western blot images available in Supplementary Figure S15.

100

101

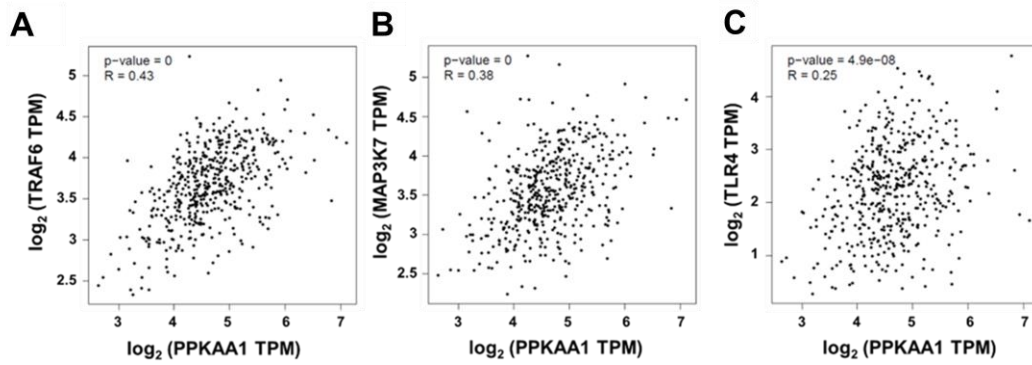

102

103

104

**Figure S7.** Correlation between AMPK $\alpha$ 1 (*PPKAA1*) and TRAF6 (A), TAK1 (*MAP3K7*) (B), or TLR4 (C) in LUAD cancers revealed by GEPIA

**Figure 1A**

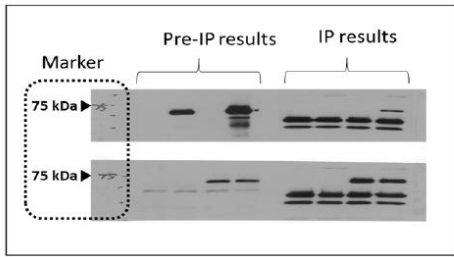

**Figure 1E**

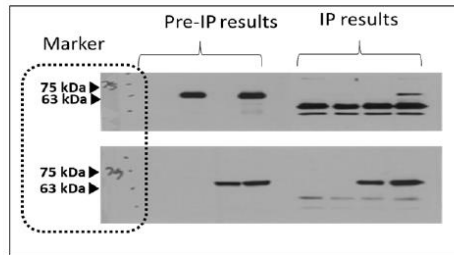

**Figure 1B**

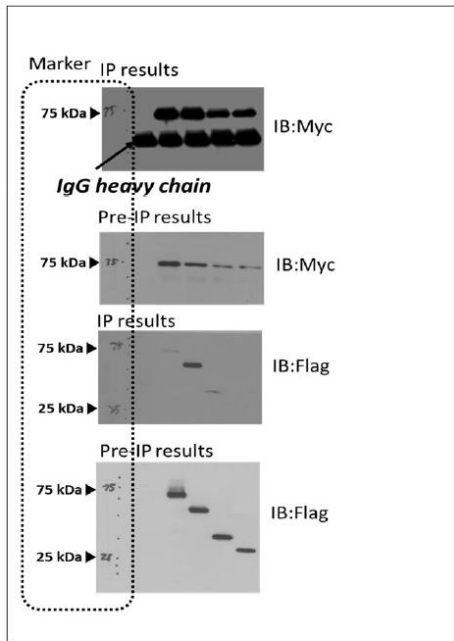

**Figure 1F**

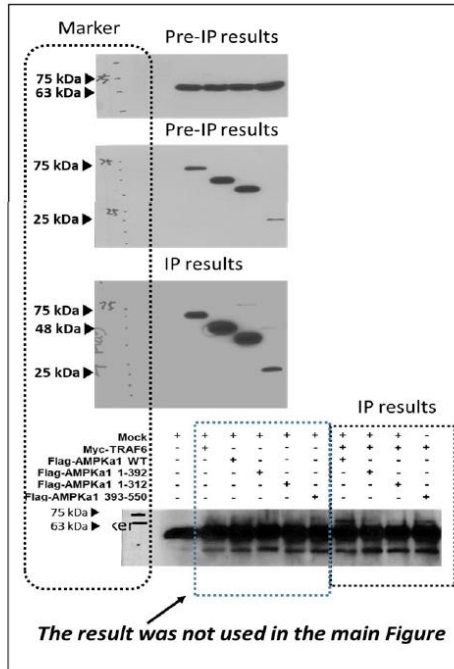

**Figure 1C**

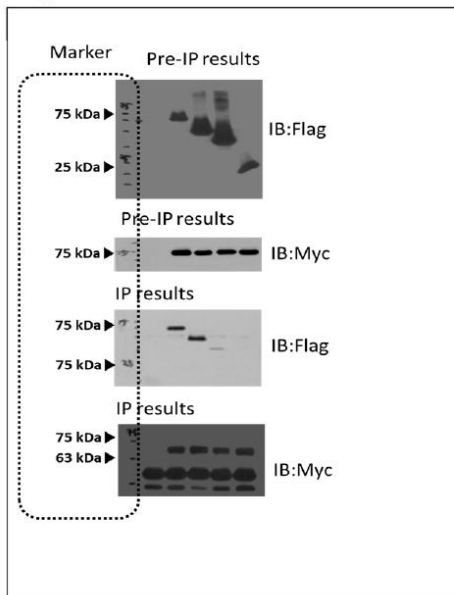

**Figure 1G**

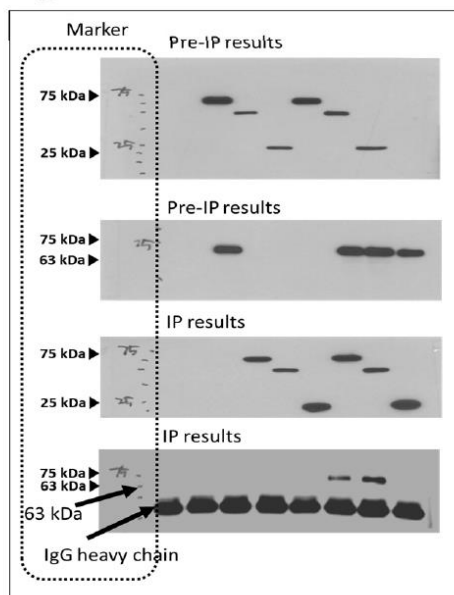

105

106

107

**Figure S8.** Uncropped western blot images for Figure 1.

Figure 2B

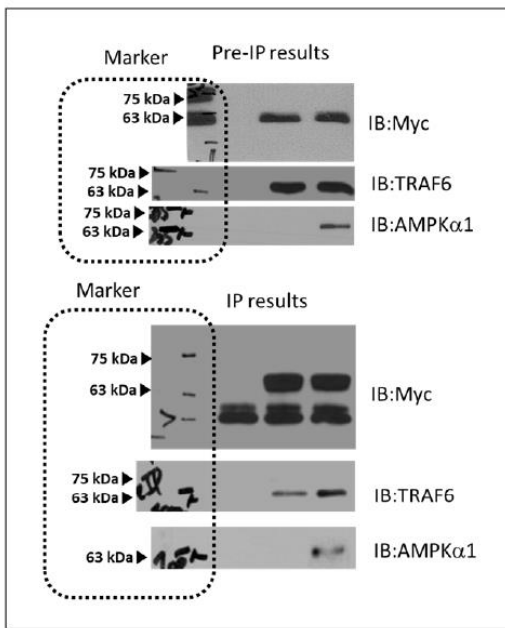

Figure 2C

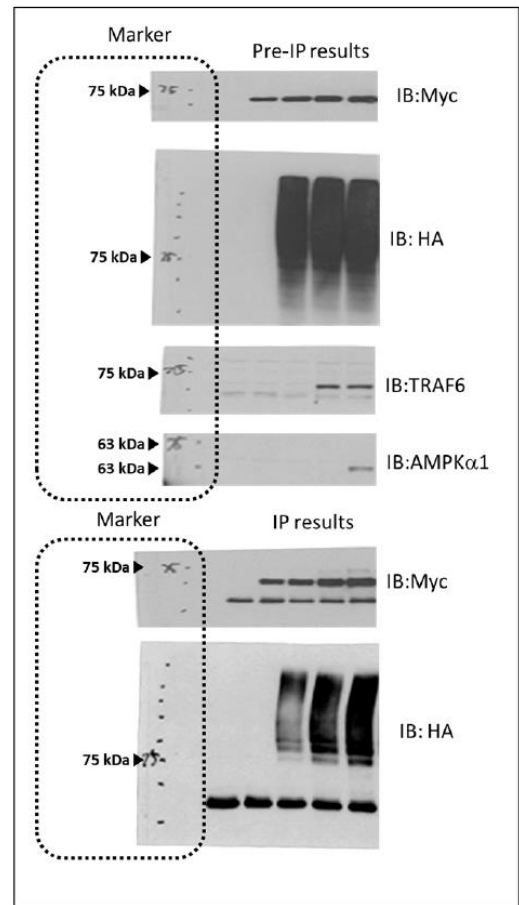

Figure 2D

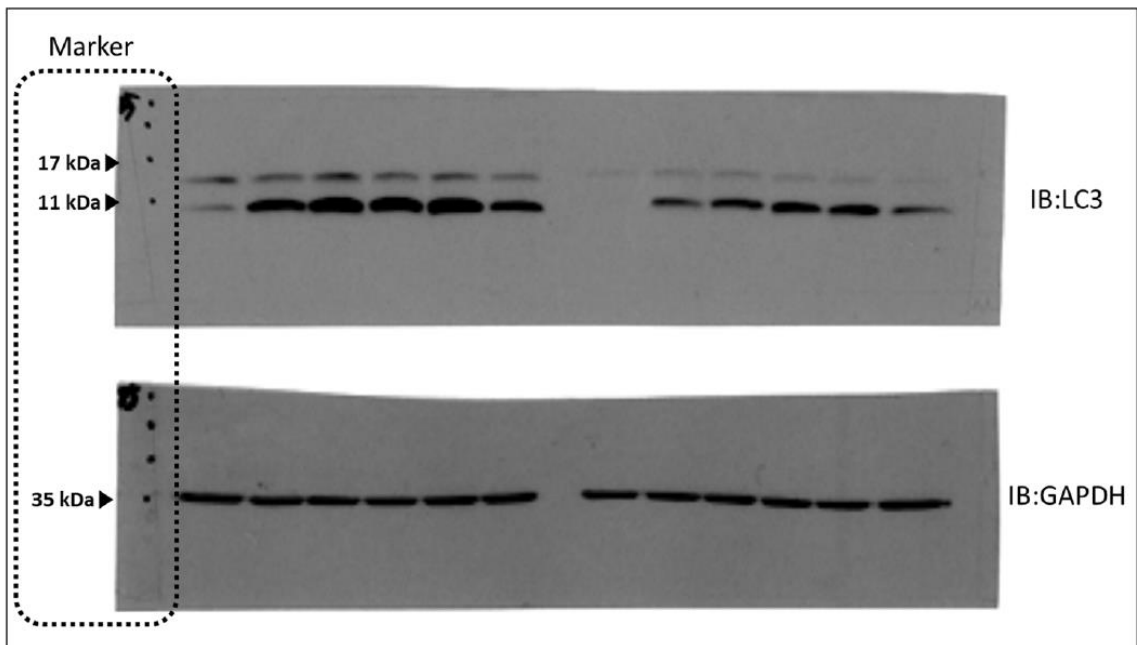

108

109

110

Figure S9. Uncropped western blot images for Figure 2.



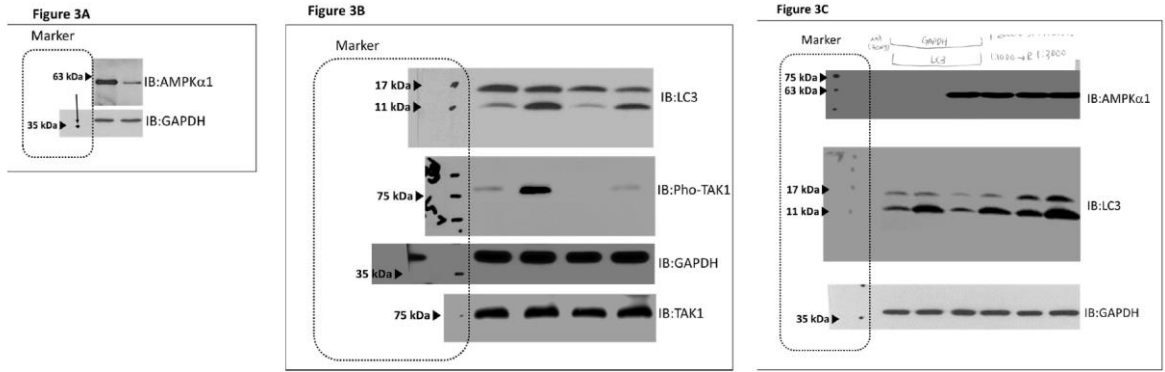

111

112

Figure S10. Uncropped western blot images for Figure 3.

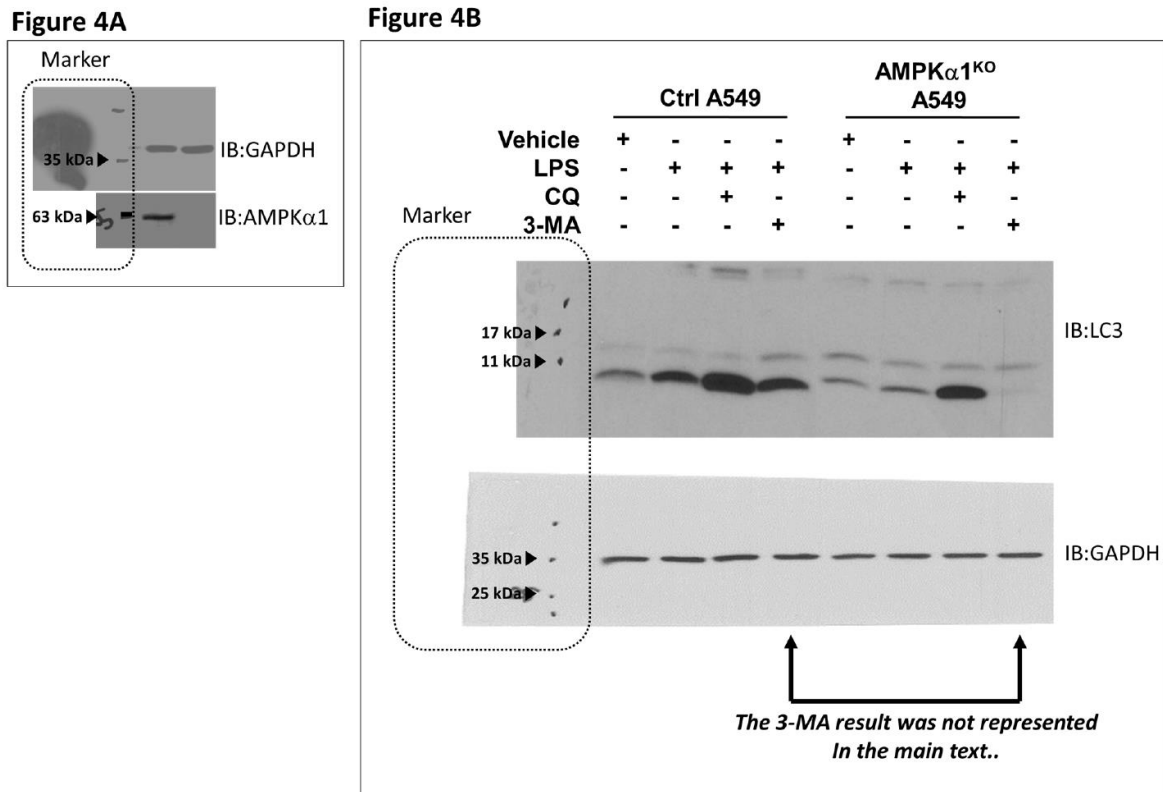

113

114

115

Figure S11. Uncropped western blot images for Figure 4.

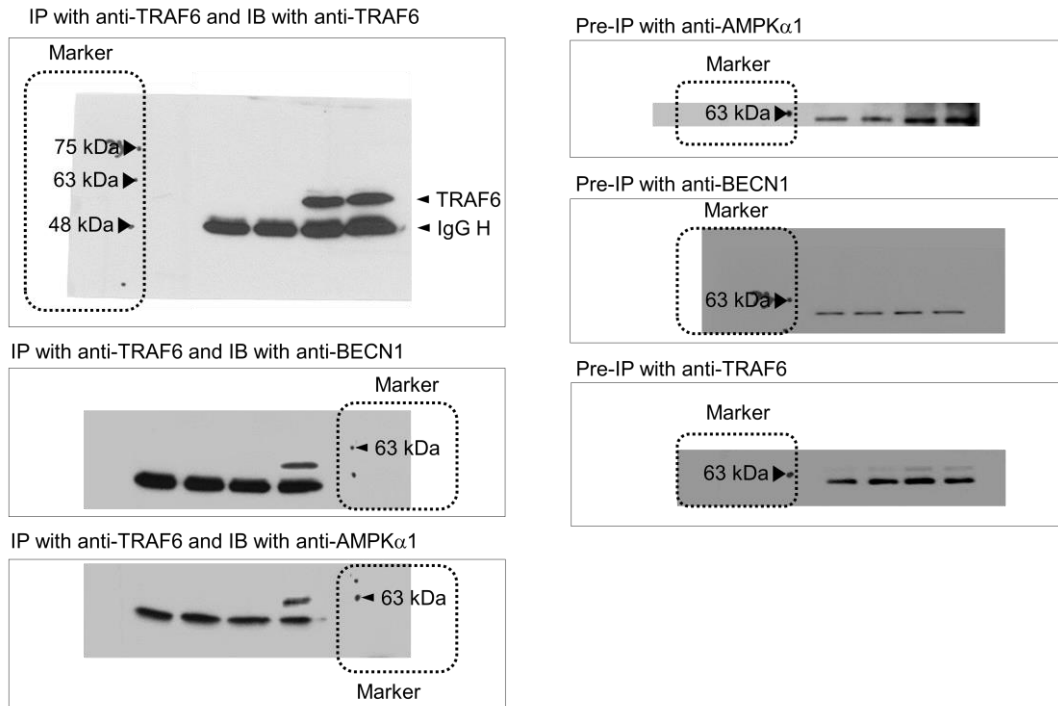

116

117

Figure S12. Uncropped western blot images for Supplementary Figure S2.

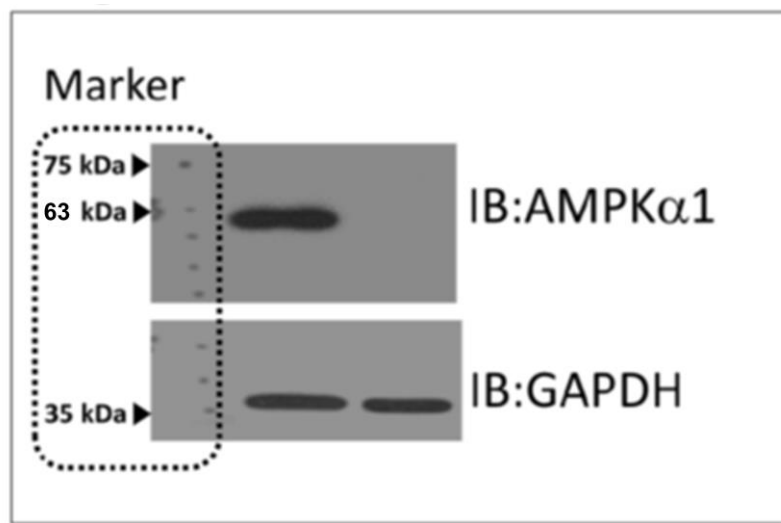

118

119

Figure S13. Uncropped western blot images for Supplementary Figure S3.

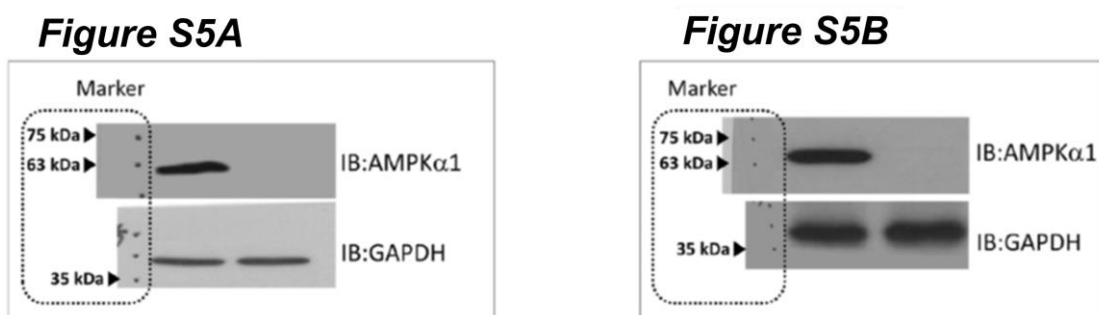

120

121

Figure S14. Uncropped western blot images for Supplementary Figure S5.

**Figure S6A**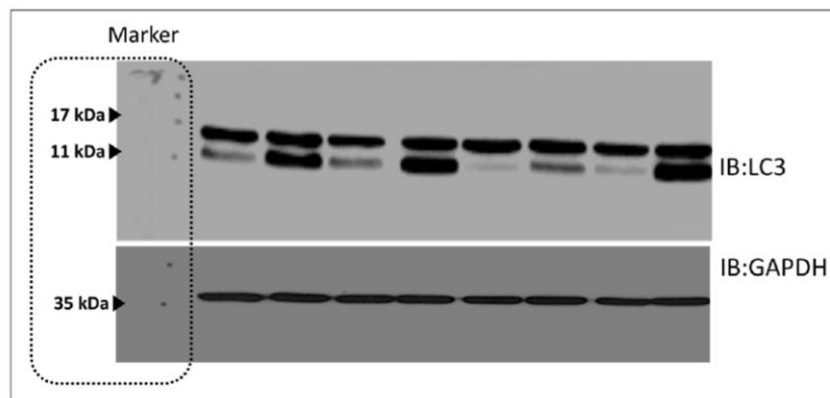**Figure S6B**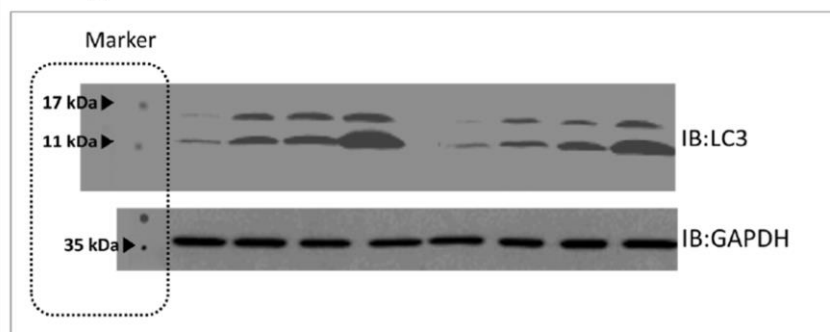

122

123

**Figure S15.** Uncropped western blot images for Supplementary Figure S6.**124 Reference**

- 125 1. Kim, S.Y.; Jeong, S.; Jung, E.; Baik, K.-H.; Chang, M.H.; Kim, S.A.; Shim, J.-H.; Chun, E.; Lee, K.-Y. AMP-  
 126 activated protein kinase- $\alpha$ 1 as an activating kinase of TGF- $\beta$ -activated kinase 1 has a key role in  
 127 inflammatory signals. *Cell Death Dis.* **2012**, *3*, e357.
- 128 2. Min, Y.; Kim, M.J.; Lee, S.; Chun, E.; Lee, K.Y. Inhibition of TRAF6 ubiquitin-ligase activity by PRDX1 leads  
 129 to inhibition of NF- $\kappa$ B activation and autophagy activation. *Autophagy* **2018**, *14*, 1347–1358.
- 130 3. Min, Y.; Lee, S.; Kim, M.J.; Chun, E.; Lee, K.Y. Ubiquitin-Specific Protease 14 Negatively Regulates Toll-  
 131 Like Receptor 4-Mediated Signaling and Autophagy Induction by Inhibiting Ubiquitination of TAK1-  
 132 Binding Protein 2 and Beclin 1. *Front. Immunol.* **2017**, *8*, 1827.
- 133 4. Kim, M.J.; Min, Y.; Im, J.S.; Son, J.; Lee, J.S.; Lee, K.Y. p62 is Negatively Implicated in the TRAF6-BECN1  
 134 Signaling Axis for Autophagy Activation and Cancer Progression by Toll-Like Receptor 4 (TLR4). *Cells*  
 135 **2020**, *9*, 1142.
- 136 5. Min, Y.; Wi, S.M.; Shin, D.; Chun, E.; Lee, K.Y. Peroxiredoxin-6 Negatively Regulates Bactericidal Activity  
 137 and NF- $\kappa$ B Activity by Interrupting TRAF6-ECSIT Complex. *Front. Cell Infect. Microbiol.* **2017**, *7*, 94.
- 138 6. Min, Y.; Wi, S.M.; Kang, J.A.; Yang, T. Cereblon negatively regulates TLR4 signaling through the  
 139 attenuation of ubiquitination of TRAF6. *Cell Death Dis.* **2016**, *7*, e2313.
- 140 7. Kim, M.J.; Min, Y.; Shim, J.H.; Chun, E.; Lee, K.Y. CRBN Is a Negative Regulator of Bactericidal Activity  
 141 and Autophagy Activation Through Inhibiting the Ubiquitination of ECSIT and BECN1. *Front. Immunol.*  
 142 **2019**, *10*, 2203.

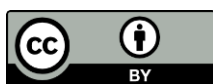

© 2020 by the authors. Licensee MDPI, Basel, Switzerland. This article is an open access article distributed under the terms and conditions of the Creative Commons Attribution (CC BY) license (<http://creativecommons.org/licenses/by/4.0/>).

143
